# Supplementary material for: Evaluation of Low-Cost Sensors for Ambient PM2.5 Monitoring
Source: Hindawi journal article supplement (doi:10.1155/2018/5096540), 2018-10-31
Supplement: f1 [file 5096540.f1.pdf]

## Evaluation of Low-Cost Sensors for Ambient PM<sub>2.5</sub> Monitoring – Supplementary Material

Marek Badura,<sup>1</sup> Piotr Batog,<sup>2</sup> Anetta Drzeniecka-Osiadacz,<sup>3</sup> and Piotr Modzel<sup>3</sup>

<sup>1</sup> Department of Air Conditioning, Heating, Gas Engineering and Air Protection, Faculty of Environmental Engineering, Wrocław University of Science and Technology, 50-373 Wrocław, Poland.

<sup>2</sup> INSYSPO, 54-427 Wrocław, Poland.

<sup>3</sup> Department of Climatology and Atmosphere Protection, Institute of Geography and Regional Development, Faculty of Earth Science and Environmental Management, University of Wrocław, 51-621 Wrocław, Poland.

Correspondence should be addressed to Marek Badura; [marek.badura@pwr.edu.pl](mailto:marek.badura@pwr.edu.pl)

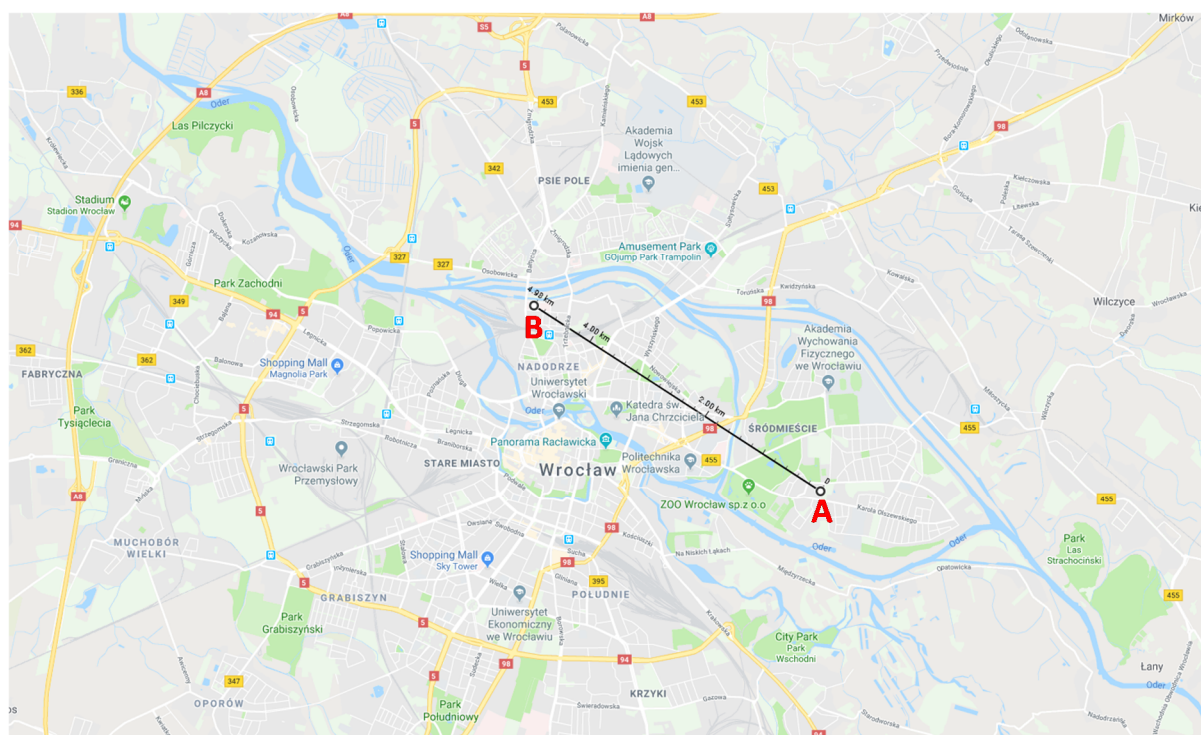

Figure S1: Location of measurement stations: A – Meteorological Observatory of Department of Climatology and Atmosphere Protection of University of Wrocław (Kosiby Street: 51°06'18.6" N; 17°05'21.4" E) equipped with TEOM analyser; B – Urban background station of Voivodeship Inspection for Environmental Protection (Wybrzeże Conrada-Korzeniowskiego: 51°07'45.9"N; 17°01'45.4"E) equipped with BAM analyser. The distance between points A and B is 4.98 km.

## Evaluation of Low-Cost Sensors for Ambient PM<sub>2.5</sub> Monitoring – Supplementary Material

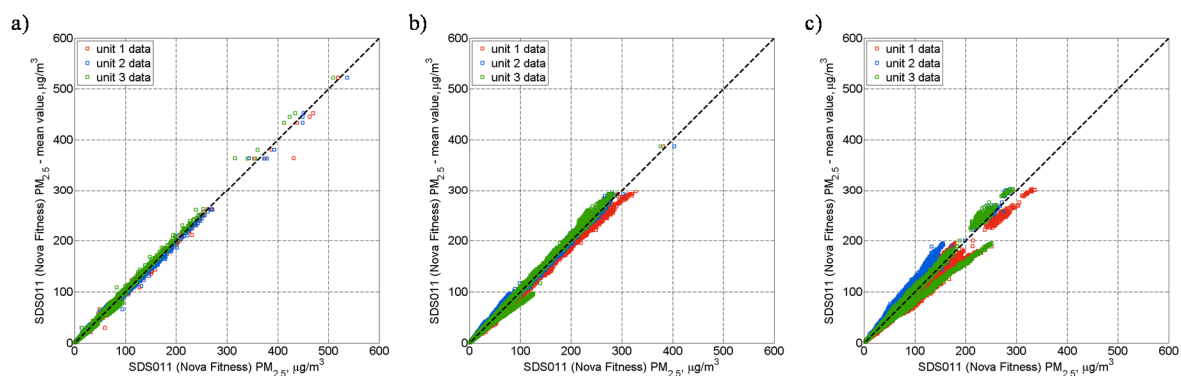

Figure S2: Scatterplots of SDS011 units outputs versus the mean values of the 1-minute averaged data for: a)  $RH \leq 80\%$  (113 396 data points), b)  $80\% < RH \leq 90\%$  (91 836 data points), c)  $RH > 90\%$  (25 979 data points). Dashed lines denote the ideal relationship.

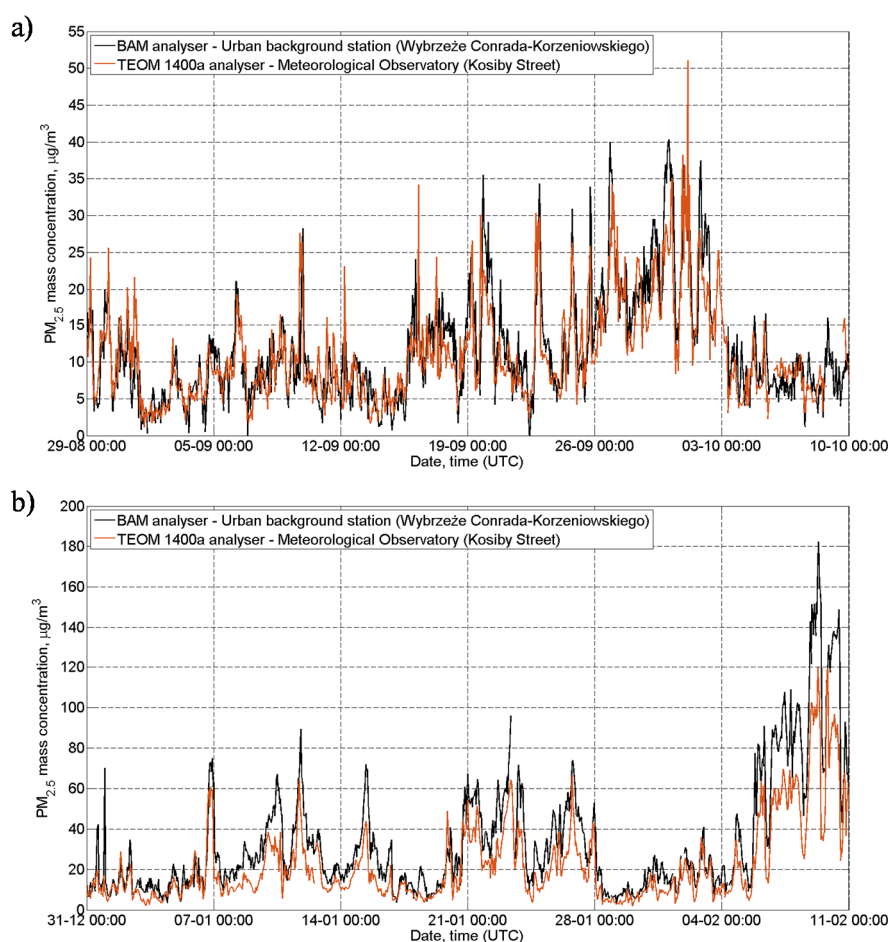

Figure S3: Examples of 1-hour averaged data from governmental urban background station (BAM analyser) and from meteorological observatory of University of Wrocław (TEOM 1400a analyser) for: a) non-heating period, b) heating period.

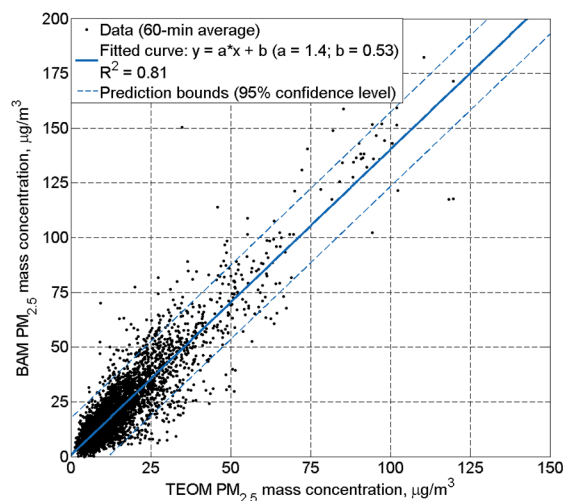

Figure S4: Relationship between BAM analyser from governmental urban background station (Wybrzeże Conrada-Korzeniowskiego) and TEOM 1400a analyser from meteorological observatory of University of Wrocław (Kosiby Street).

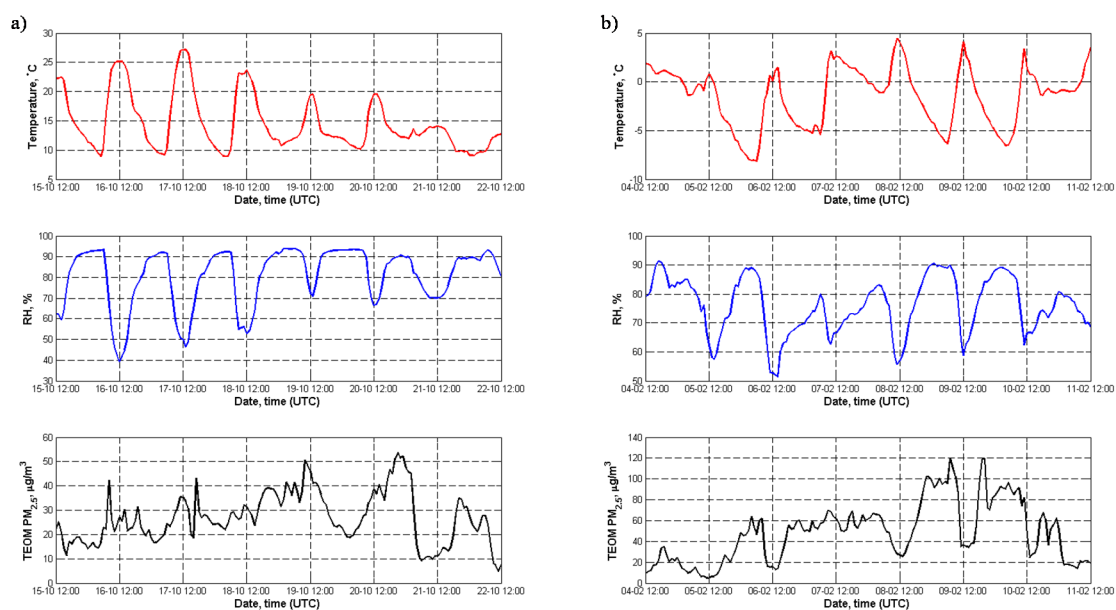

Figure S5: Examples of diurnal variation of temperature, relative humidity and PM<sub>2.5</sub> concentration: a) at the beginning of the heating period, b) in the middle of the heating period.

## Evaluation of Low-Cost Sensors for Ambient PM<sub>2.5</sub> Monitoring – Supplementary Material

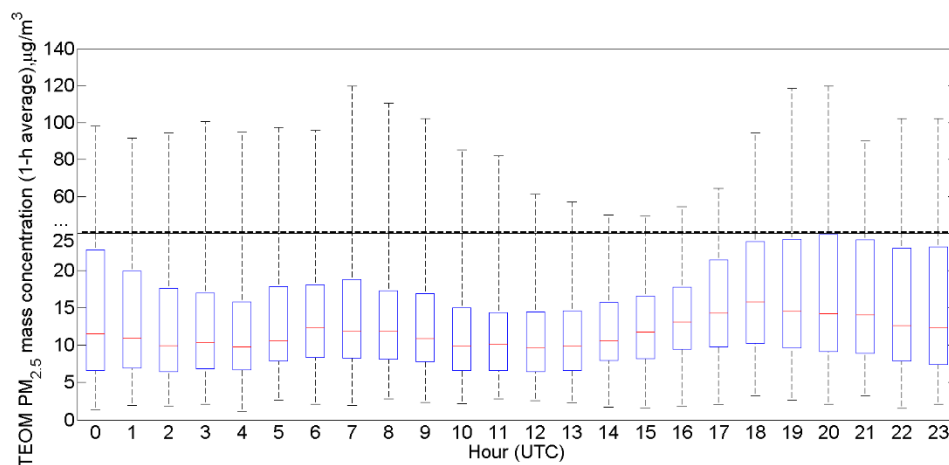

Figure S6: Box plot of daily distribution of TEOM PM<sub>2.5</sub> concentrations during measuring campaign. Distribution based on 1-hour averages. The central red mark indicates the median; the bottom and top edges of the box indicate the 25th and 75th percentiles, respectively; the whiskers extend to the most extreme data points. Dashed line denotes the break on Y-axis.

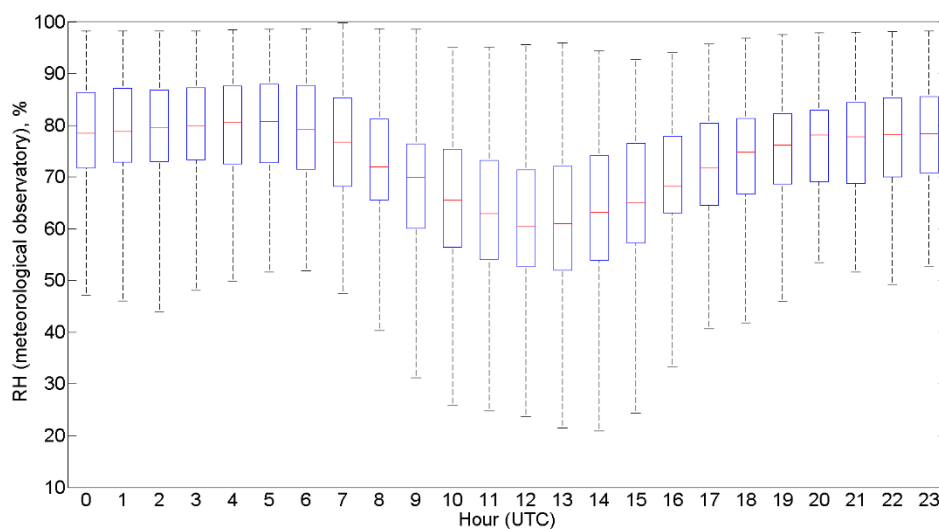

Figure S7: Box plot of daily distribution of relative humidity (RH) values during measuring campaign. Distribution based on 1-hour averages. The central red mark indicates the median; the bottom and top edges of the box indicate the 25th and 75th percentiles, respectively; the whiskers extend to the most extreme data points.

## Evaluation of Low-Cost Sensors for Ambient PM<sub>2.5</sub> Monitoring – Supplementary Material

Table S1: Parameters of linear fittings for tested PM sensors and 1-min averages:  $a$  – slope,  $b$  – intercept.

| Sensor model | SDS011 |      |      | ZH03A |      |      | PMS7003 |      |      | PMS7003<br>“AE” |      |      | OPC-N2 |       |      |
|--------------|--------|------|------|-------|------|------|---------|------|------|-----------------|------|------|--------|-------|------|
| Unit         | 1      | 2    | 3    | 1*    | 2**  | 3    | 1       | 2    | 3    | 1               | 2    | 3    | 1      | 2     | 3    |
| $a$          | 0.35   | 0.39 | 0.38 | -     | 0.34 | 0.31 | 0.26    | 0.27 | 0.28 | 0.41            | 0.42 | 0.43 | 0.20   | 0.19  | 0.13 |
| $b$          | 5.17   | 4.88 | 5.06 | -     | 7.48 | 4.01 | 3.53    | 3.49 | 3.34 | 1.04            | 0.94 | 0.69 | 8.40   | 10.17 | 9.97 |

\*Unit No. 1 was excluded from calculations due to malfunction

\*\*Calculations for Unit No. 2 for the period 21/08/2017 – 24/12/2017, before sensor replacement

Table S2: Parameters of linear fittings for tested PM sensors and 15-min averages:  $a$  – slope,  $b$  – intercept.

| Sensor model | SDS011 |      |      | ZH03A |      |      | PMS7003 |      |      | PMS7003<br>“AE” |      |      | OPC-N2 |       |      |
|--------------|--------|------|------|-------|------|------|---------|------|------|-----------------|------|------|--------|-------|------|
| Unit         | 1      | 2    | 3    | 1*    | 2**  | 3    | 1       | 2    | 3    | 1               | 2    | 3    | 1      | 2     | 3    |
| $a$          | 0.35   | 0.40 | 0.38 | -     | 0.34 | 0.32 | 0.26    | 0.28 | 0.29 | 0.41            | 0.42 | 0.43 | 0.20   | 0.19  | 0.13 |
| $b$          | 5.11   | 4.79 | 4.99 | -     | 7.43 | 3.63 | 3.44    | 3.39 | 3.23 | 0.92            | 0.81 | 0.55 | 8.38   | 10.16 | 9.96 |

\*Unit No. 1 was excluded from calculations due to malfunction

\*\*Calculations for Unit No. 2 for the period 21/08/2017 – 24/12/2017, before sensor replacement

Table S3: Parameters of linear fittings for tested PM sensors and 1-hour averages:  $a$  – slope,  $b$  – intercept.

| Sensor model | SDS011 |      |      | ZH03A |      |      | PMS7003 |      |      | PMS7003<br>“AE” |      |      | OPC-N2 |       |      |
|--------------|--------|------|------|-------|------|------|---------|------|------|-----------------|------|------|--------|-------|------|
| Unit         | 1      | 2    | 3    | 1*    | 2**  | 3    | 1       | 2    | 3    | 1               | 2    | 3    | 1      | 2     | 3    |
| $a$          | 0.35   | 0.40 | 0.38 | -     | 0.34 | 0.33 | 0.26    | 0.28 | 0.29 | 0.41            | 0.42 | 0.43 | 0.20   | 0.19  | 0.13 |
| $b$          | 5.07   | 4.76 | 4.96 | -     | 7.40 | 3.28 | 3.40    | 3.36 | 3.19 | 0.89            | 0.78 | 0.52 | 8.36   | 10.13 | 9.93 |

\*Unit No. 1 was excluded from calculations due to malfunction

\*\*Calculations for Unit No. 2 for the period 21/08/2017 – 24/12/2017, before sensor replacement

Table S4: Parameters of linear fittings for tested PM sensors and 24-hour averages:  $a$  – slope,  $b$  – intercept.

| Sensor model | SDS011 |      |      | ZH03A |      |      | PMS7003 |      |      | PMS7003<br>“AE” |      |      | OPC-N2 |      |      |
|--------------|--------|------|------|-------|------|------|---------|------|------|-----------------|------|------|--------|------|------|
| Unit         | 1      | 2    | 3    | 1*    | 2**  | 3    | 1       | 2    | 3    | 1               | 2    | 3    | 1      | 2    | 3    |
| $a$          | 0.36   | 0.40 | 0.39 | -     | 0.33 | 0.35 | 0.27    | 0.28 | 0.29 | 0.41            | 0.42 | 0.43 | 0.21   | 0.21 | 0.15 |
| $b$          | 4.76   | 4.66 | 4.80 | -     | 7.70 | 2.54 | 3.38    | 3.31 | 3.08 | 0.96            | 0.83 | 0.53 | 7.88   | 9.49 | 9.04 |

\*Unit No. 1 was excluded from calculations due to malfunction

\*\*Calculations for Unit No. 2 for the period 21/08/2017 – 24/12/2017, before sensor replacement
